# Supplementary material for: Heterometal expansion of oxozirconium carboxylate clusters
Source: Royal Society of Chemistry journal article supplement (doi:10.1039/c0dt01136c), 2010-11-23
Supplement: c0dt01136c.pdf [file c0dt01136c.pdf]

## Electronic Supplementary Information

# Heterometal Expansion of Oxozirconium Carboxylate Clusters

Iurii L. Malaestean, Manfred Speldrich, Arkady Ellern, Svetlana G. Baca and Paul Kögerler\*

## Experimental Section

**Syntheses of complexes.** The precursors  $[\text{Mn}_3\text{O}(\text{ib})_6(\text{im})_3]\cdot 3\text{Hiz}$  (**6**),  $[\text{Fe}_3\text{O}(\text{piv})_6(\text{H}_2\text{O})_3]\text{piv}\cdot 2\text{Hpiv}$  (**7**),  $[\text{Zr}_6\text{O}_4(\text{OH})_4(\text{piv})_{12}]$  (**8**), and  $[\text{Zr}_6\text{O}_4(\text{OH})_4(\text{ib})_{12}(\text{H}_2\text{O})]\cdot 3\text{Hib}$  (**9**) (im = imidazole) were prepared according to the previously reported procedures (see ref. 6, 7c, and S. W. Zhang, Y. G. Wie, Q. Liu, M. C. Shao and W. S. Zhou, *Polyhedron*, 1996, **15**, 1041; N. V. Gerbeleu, A. S. Batsanov, G. A. Timko, I. K. Struchkov, K. M. Indrichan, and G. A. Popovich, *Dokl. Akad. Nauk SSSR*, 1987, **293**, 364 (in Russian)).

**$[\text{Fe}_2\text{Zr}_6\text{O}_6(\text{OH})_2(\text{piv})_{12}(\text{bdea})_2]\cdot \text{MeCN}\cdot 0.25 \text{H}_2\text{O}$  (**1**).** N-butyldiethanolamine (0.085 ml, 0.51 mmol) was added to a mixture of **7** (0.09 g, 0.08 mmol) and **8** (0.1 g, 0.05 mmol) in 5 mL MeCN. The resulting solution was sealed in a PTFE-lined stainless steel reactor and heated to 120 °C for 10 h, then slowly cooled to room temperature over 48 h. Yellow crystals were collected by filtration, washed with MeCN and dried in air (yield: 0.05 g, 41.6% based on Zr). Elemental analysis, calculated (found) for  $\text{C}_{88}\text{H}_{146}\text{Fe}_2\text{N}_2\text{O}_{36}\text{Zr}_6$  (without solvate molecules): C, 39.37 (38.98); H, 6.43 (6.34); N, 1.20 (1.31). IR data (KBr,  $\text{cm}^{-1}$ ): 3414br/m, 2962m, 2927sh, 2868s, 1563s, 1484s, 1422s, 1360m, 1337m, 1229s, 1104m, 1031w, 906w, 786m.

**$[\text{Mn}_2\text{Zr}_6\text{O}_6(\text{OH})_2(\text{ib})_{12}(\text{bdea})_2(\text{H}_2\text{O})_2]$  (**2**).** N-butyldiethanolamine (0.085 ml, 0.51 mmol) was added to a mixture of **6** (0.05 g, 0.04 mmol) and **9** (0.09 g, 0.04 mmol) in 5 mL MeCN. The resulting solution was stirred for 3 h, filtered off and left in a covered vial. Pink crystals formed within a few days, were collected by filtration, washed with MeCN and dried in air (yield: 0.06 g, 66.7% based on Zr). Elemental analysis, calculated (found) for  $\text{C}_{64}\text{H}_{126}\text{Mn}_2\text{N}_2\text{O}_{38}\text{Zr}_6$ : C, 35.19 (35.00); H, 5.91 (5.67); N, 1.28 (1.41). IR data (KBr,  $\text{cm}^{-1}$ ): 3417br/m, 2967m, 2931sh, 2871w, 1573vs, 1473m, 1426s, 1359w, 1286w, 1260w, 1095m, 648m, 616m.

**$[\text{Ni}_3\text{Zr}_6\text{O}_4(\text{OH})_4(\text{ib})_{12}(\text{bdea})_3]\cdot 0.67\text{MeCN}$  (**3**).** N-butyldiethanolamine (0.085 ml, 0.51 mmol) was added to a solution of **9** (0.09 g, 0.04 mmol) and  $\text{Ni}(\text{NO}_3)_2\cdot 6\text{H}_2\text{O}$  (0.06 g, 0.2 mmol) in 5 mL MeCN. The resulting solution was refluxed for 1 h, filtered off and left in a covered vial. Green blue crystals were collected by filtration in a few days, washed with MeCN and dried in air (yield: 0.06 g, 54% based on Zr). Elemental analysis, calculated (found) for  $\text{C}_{72}\text{H}_{145}\text{N}_3\text{Ni}_3\text{O}_{40}\text{Zr}_6$  (without solvate molecules): C, 36.40 (36.11); H, 6.15 (5.72); N, 1.77 (1.85). IR data (KBr,  $\text{cm}^{-1}$ ): 3431br/m, 2963m, 2927sh, 2868w, 1621s, 1566s, 1478s, 1428s, 1358w, 1293w, 1228w, 1097m, 917m, 829w, 603w.

**$[\text{Ni}_3\text{Zr}_6\text{O}_4(\text{OH})_4(\text{ib})_{10}(\text{PhO})_2(\text{bdea})_3]\cdot 2\text{MeCN}$  (**4**).** N-butyldiethanolamine (0.085 ml, 0.51 mmol) was added to a solution of **9** (0.09 g, 0.04 mmol), phenol (0.045 g, 0.47 mmol) and  $\text{Ni}(\text{NO}_3)_2\cdot 6\text{H}_2\text{O}$  (0.06 g, 0.2 mmol) in 5 mL MeCN. The resulting solution was refluxed for 2 h, filtered off and left in a covered vial. Green blue crystals were collected by filtration in a few days, washed with MeCN and dried in air (yield: 0.05 g, 45.4% based on Zr). Elemental analysis, calculated (found) for  $\text{C}_{76}\text{H}_{135}\text{N}_3\text{Ni}_3\text{O}_{36}\text{Zr}_6$  (without solvate molecules): C, 38.33 (38.12); H, 5.71 (5.59); N, 1.76 (1.81). IR data (KBr,  $\text{cm}^{-1}$ ): 3435br/m, 2964m, 2929sh, 2870w, 1579vs, 1474s, 1426s, 1360w, 1294m, 1163m, 918m, 756m, 701w, 626m.

**$[\text{Ni}_6\text{Zr}_6\text{O}_8(\text{ib})_{12}(\text{Hbdea})_6](\text{NO}_3)_2\cdot 4\text{PhOH}$  (**5**).** N-butyldiethanolamine (0.085 ml, 0.51 mmol) was added to a solution of **9** (0.09 g, 0.04 mmol), phenol (0.09 g, 0.95 mmol) and  $\text{Ni}(\text{NO}_3)_2\cdot 6\text{H}_2\text{O}$  (0.06 g, 0.2 mmol)

in 5 mL MeCN. The resulting solution was refluxed for 5 h, filtered off and left in a covered vial. Green crystals were collected by filtration, washed with MeCN and dried in air (yield: 0.06 g, 40% based on Zr). Elemental analysis, calculated (found) for  $C_{96}H_{168}N_5Ni_6O_{48}Zr_6$ : C, 40.83 (40.57); H, 6.34 (6.00); N, 3.17 (3.15). IR data (KBr,  $cm^{-1}$ ): 3223br/m, 2961m, 2871m, 1622vs, 1472s, 1427s, 1376m, 1293m, 1102m, 1016, 910m, 841w, 754m, 693m, 624m, 484m.

## Magnetochemical Analysis

The computational framework CONDON is used for the analysis of the magnetic susceptibility data of compounds **1–5**. CONDON allows the simulation of both intramolecular exchange coupling and single-ion effects: interelectronic repulsion ( $H_{ee}$ ), spin-orbit coupling ( $H_{so}$ ), ligand-field effect ( $H_{lf}$ ), and the Zeeman effect of an applied field ( $H_{mag}$ ).<sup>1</sup>

**Theoretical modeling:** The spin Hamiltonian of a single  $d^N$  metal ion in a ligand field environment of a distinct point symmetry in a static magnetic field  $\mathbf{B}$  is represented by

$$\hat{H} = \underbrace{\sum_{i=1}^N \left[ -\frac{\hbar}{2m_e} \nabla_i^2 + V(r_i) \right]}_{\hat{H}^{(0)}} + \underbrace{\sum_{i>j}^N \frac{e^2}{r_{ij}}}_{\hat{H}_{ee}} + \underbrace{\sum_{i=1}^N \zeta(r_i) \kappa \hat{l}_i \cdot \hat{s}_i}_{\hat{H}_{so}} + \underbrace{\sum_{i=1}^N \sum_{k=0}^{\infty} \left\{ B_0^k C_0^k(i) + \sum_{q=2}^k \left[ B_q^k (C_{-q}^k(i) + (-1)^q C_q^k(i)) \right] \right\}}_{\hat{H}_{lf}} + \underbrace{\sum_{i=1}^N \mu_B (\kappa \hat{l}_i + 2\hat{s}_i) \cdot \mathbf{B}}_{\hat{H}_{mag}}$$

where  $H^{(0)}$  represents the energy in the central field approximation,  $H_{ee}$  and  $H_{so}$  account for interelectronic repulsion and spin-orbit coupling (modified by the orbital reduction factor  $\kappa$ ), respectively. The former is taken into account by the Slater-Condon parameters  $F^2$ ,  $F^4$ ,  $F^6$ , the latter by the one-electron spin-orbit coupling parameter  $\zeta$ . These sets of interelectronic repulsion parameters as well as  $\zeta$  and  $\kappa$  are used as constants in the fitting calculations.

$H_{lf}$  represents the electrostatic effect of the ligands in the framework of ligand field theory on the basis of the global parameters  $B_q^k$ . The spherical tensors  $C_q^k$  are directly related to the spherical harmonics  $C_q^k = \sqrt{4\pi(2k+1)} Y_q^k$  and the real ligand field parameters  $B_q^k$  (Wybourne notation) are given by  $A_q^k \langle r^k \rangle$  where  $A_q^k$  is a numerical constant describing the charge distribution in the environment of the metal ion and  $\langle r^k \rangle$  is the expectation value of  $\langle r^k \rangle$  for the wave function.

For  $d$  electrons the terms in the expansion with  $k \leq 4$  are nonzero, whereas all terms with odd  $k$  values vanish since we consider only configurations containing equivalent electrons. The values of  $k$  and  $q$  are limited by the point symmetry of the metal ion site. If the spherically symmetric term  $B_0^0 C_0^0$  (which does not cause any splitting) is ignored, in cubic systems only spherical tensors with  $k = 4$  are relevant and all  $B_q^k$  are zero. The ligand field operator with reference to the  $C_4$  axis for the angular part of the wave function reads

$$H_{lf}^{cub} = B_0^4 \sum_{i=1}^N C_0^4(i) + \sqrt{5/14} (C_4^4(i) + C_{-4}^4(i)).$$

Here, a fixed relation  $B_4^4 = \sqrt{5/14} B_0^4$  exist, so that only the coefficient  $B_0^4$  is essential;  $N$  is the number of the electrons.

Exchange interactions between the spin centers are described by a Heisenberg-Dirac-Van Vleck operator of the type

$$\hat{H}_{\text{ex}} = -J\hat{S}_1 \cdot \hat{S}_2$$

In the high-temperature limit the Weiss temperature  $\theta$  contains the contributions of all interactions between magnetic centers according to

$$\theta = \frac{2S(S+1)}{3k_B} \sum_i z_i J_i$$

where  $z_i$  is the number of neighbors with the interaction characterized by the coupling constant  $J_i$  (with  $i = 1$  indicating nearest-neighbor interactions,  $i = 2$  next-nearest neighbor interactions, etc.)

The values for spin-orbit coupling constants  $\zeta$  and Racah parameters were determined from optical spectra, respectively and used as constant during the calculations (see Table S1).

Table S1: Magnetochemical parameters

| Compound                                                  | 1                                   | 2                                   | 3                                   | 4      | 5                                  |
|-----------------------------------------------------------|-------------------------------------|-------------------------------------|-------------------------------------|--------|------------------------------------|
| Magnetic centers                                          | Fe <sup>3+</sup> (3d <sup>5</sup> ) | Mn <sup>3+</sup> (3d <sup>4</sup> ) | Ni <sup>2+</sup> (3d <sup>8</sup> ) |        |                                    |
| $B, C / \text{cm}^{-1}$                                   | 1058, 3900                          | 990, 3680                           | 1080, 4860                          |        |                                    |
| $\zeta / \text{cm}^{-1}$                                  | 400                                 | 270                                 | 600                                 |        |                                    |
| $\theta / \text{K}$                                       | -0.5                                | -0.4                                | -4.6                                | -2.3   | -9.8                               |
| $C / \text{cm}^3 \text{K mol}^{-1}$                       | 4.380                               | 2.981                               | 1.259                               | 1.266  | 1.193                              |
| $B_0^4$                                                   | –                                   | 19900                               | 21100                               | 21100  | 26000                              |
| $g_{\text{iso}}$                                          | 1.999                               | 1.994                               | 2.22                                | 2.22   | 2.19                               |
| $J / \text{cm}^{-1}$                                      | -0.14                               | -0.12                               | -2.4                                | -1.2   | -4.12 ( $J_1$ )<br>-1.56 ( $J_2$ ) |
| $SQ$                                                      | 0.9%                                | 0.9%                                | 0.8%                                | 0.8%   | 1.0%                               |
| $\chi_{\text{dia}} / 10^{-3} \text{cm}^3 \text{mol}^{-1}$ | -1.183                              | -1.093                              | -3.609                              | -1.237 | -1.767                             |

$$SQ = \sqrt{\sum_{i=1}^n ([\chi_{\text{obs}}(i) - \chi_{\text{cal}}(i)] / \chi_{\text{obs}}(i))^2}$$

### Compounds 1 and 2

Due to its electronic configuration (3d<sup>5</sup>) and the resulting singlet term  ${}^6S_{5/2}$  of the free Fe<sup>3+</sup> ion, the {Fe<sub>2</sub>Zr<sub>6</sub>} cluster in **1** should represent a pure spin Curie paramagnet in the absence of exchange interactions and saturation effects. Above 50 K, the low-field (0.1 Tesla) susceptibility is reproduced by a Curie-Weiss expression,  $\chi_m = C/(T - \theta)$  with  $C = 4.380 \text{ cm}^3 \text{K mol}^{-1}$  and  $\theta = -0.5 \text{ K}$ . The experimentally determined effective Bohr magneton number ( $\mu_{\text{eff}}$ ) approaches a value of 5.92  $\mu_B$  per magnetic center towards 300 K, exactly matching that of an  $s = 5/2$  ( $g = 2.0$ ) system. At 2.0 K, the field dependence of the molar susceptibility follows the corresponding Brillouin expression.

The Mn<sup>3+</sup> ion exhibits a  ${}^5D_0$  ground state with  $S = 2$  in octahedral high-spin environments. Due to its electronic configuration (3d<sup>4</sup>) and the resulting doublet term  ${}^5E$  of the Mn<sup>3+</sup> ion, the cluster in **2** should

exhibit Curie behavior if the ligand field strength  $Dq^1$  is in the range from  $500\text{ cm}^{-1}$  up to  $1500\text{ cm}^{-1}$ , again as long as exchange interactions and saturation effects play no significant role. At room temperature the effective Bohr magneton number per  $\text{Mn}^{3+}$  ion is 4.9. The  $\chi_m^{-1}$  vs.  $T$  plot shows a linear range between 80 and 290 K. This observation is supported by a linear fit reciprocal molar susceptibility to the Curie law above 30 K, leading to  $C = 2.981\text{ cm}^3\text{ K mol}^{-1}$  and a Weiss constant  $\theta = -0.4\text{ K}$ . We note that the experimentally derived magnetic moment from the Curie constant  $C$  is equal to 4.87 and is very close to the pure spin system ( $\text{Mn}^{3+}$ , ligand field ground state  ${}^5E$ , four unpaired electrons,  $S = 2$ ,  $\mu_{\text{so}} = g\sqrt{S(S+1)} = 4.92\mu_{\text{B}}$  with  $g \approx 2$ ).

### Compounds 3 and 4

The  $3d^8$  systems **3** and **4** (free ion ground term  ${}^3F_4$ ) show a nearly temperature independent effective Bohr magneton number of 3.15 down to ca. 100 K. The  $\chi_m^{-1}$  vs.  $T$  plot shows Curie-Weiss-type behavior between 40 and 290 K, leading to  $C = 1.259$  (**3**) and  $C = 1.266\text{ cm}^3\text{ K mol}^{-1}$  (**4**) with  $\theta = -4.6$  and  $-2.3\text{ K}$ . Excellent agreement between the experimental data and data simulated with CONDON was achieved when a uniform Heisenberg-type exchange interaction is used:

$$\hat{H}_{\text{ex}} = -J[\hat{S}_1 \cdot \hat{S}_2 + \hat{S}_2 \cdot \hat{S}_3 + \hat{S}_1 \cdot \hat{S}_3]$$

The derived values for  $J$  correspond to  $\theta = -4.6\text{ K}$  and  $\theta = -2.3\text{ K}$  for a pure spin system, along with contributions of the ligand field, interelectronic repulsion, spin-orbit coupling and external magnetic field. The calculated ligand field parameter  $B_0^4 = 21100\text{ cm}^{-1}$  corresponds to a  $g_{\text{iso}}$  value of 2.22 for a pure spin system that takes into account ligand field effects.

### Compound 5

The molar susceptibility (Fig. 3, inset) of compound **5** displays a sharp maximum at 5.0 K characteristic of antiferromagnetic exchange coupling. The susceptibility data can be described by a Curie-Weiss-type expression above 80 K, leading to  $C = 1.193\text{ cm}^3\text{ K mol}^{-1}$  and a Weiss constant  $\theta = -9.8\text{ K}$ . The intramolecular exchange interactions between the six  $\text{Ni}^{\text{II}}$  centers are described using a spin Hamiltonian augmented by a Heisenberg-type exchange operator that differentiates two exchange pathways:

$$\hat{H}_{\text{ex}} = -J_1[\hat{S}_1 \cdot \hat{S}_6 + \hat{S}_2 \cdot \hat{S}_3 + \hat{S}_4 \cdot \hat{S}_5] - J_2[\hat{S}_1 \cdot \hat{S}_2 + \hat{S}_1 \cdot \hat{S}_3 + \hat{S}_2 \cdot \hat{S}_4 + \hat{S}_2 \cdot \hat{S}_5 + \hat{S}_3 \cdot \hat{S}_4 + \hat{S}_3 \cdot \hat{S}_6 + \hat{S}_4 \cdot \hat{S}_6 + \hat{S}_5 \cdot \hat{S}_6]$$

An excellent agreement to the experimental data is found for  $J_1 = -2.06\text{ cm}^{-1}$  and  $J_2 = -1.52\text{ cm}^{-1}$  which corresponds to a Weiss temperature of  $\theta = -9.8\text{ K}$ . The calculated  $g_{\text{iso}}$  value of 2.19 corresponds to the ligand field parameter  $B_0^4 = 26000\text{ cm}^{-1}$ .

<sup>1</sup> Note the fixed relation in octahedral systems between  $Dq$  and ligand field parameter  $B_0^4$  in Wybourne notation:  $B_0^4 = 21Dq$

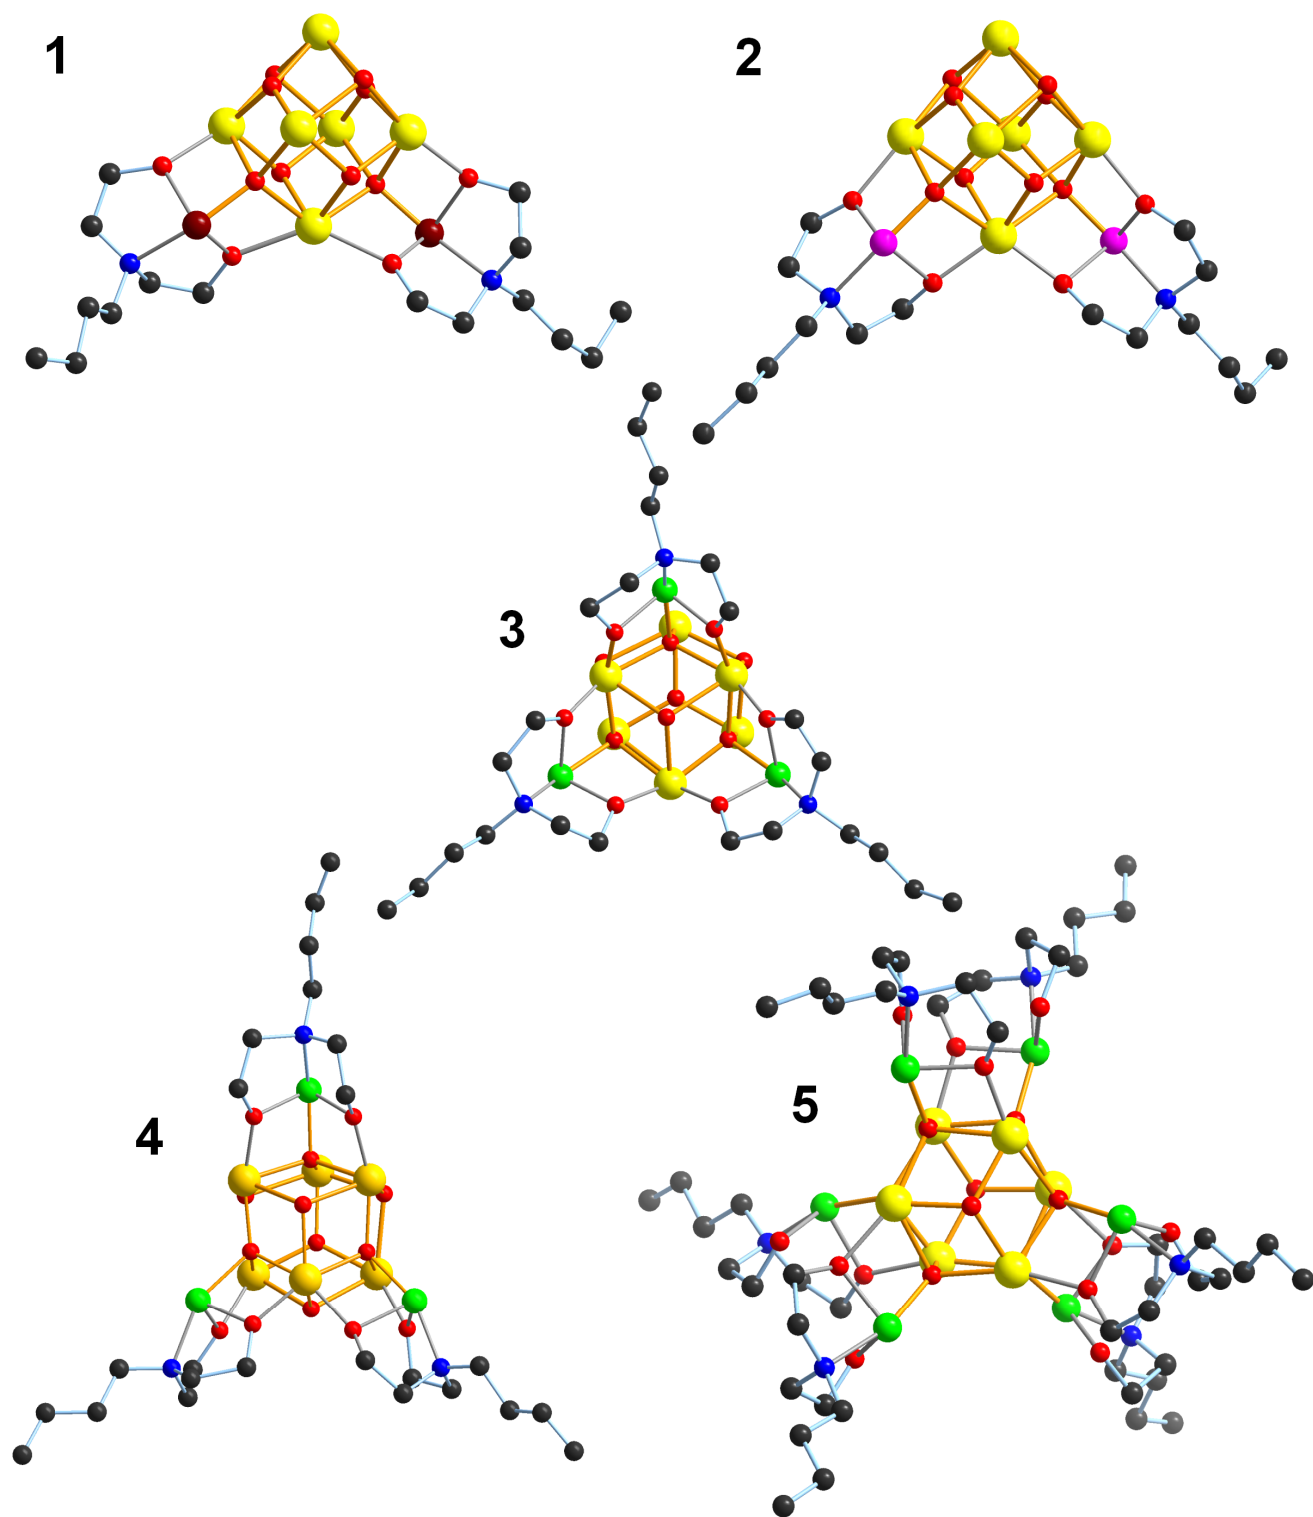

**Figure S1.** Structures of the  $\{\text{Zr}_6(\text{Mbdea})_n\}$  subfragments illustrating the  $\kappa\text{N}, \kappa^2\text{O}, \text{O}'$  binding modes of the  $\text{bdea}^{2-}$  (1–4) and  $\text{bdeaH}^-$  (5) ligands to the  $\text{M}^{\text{II/III}}$  centers. Note that in 1–4, the  $\text{bdea}^{2-}$  groups also coordinate to two adjacent  $\text{Zr}^{\text{IV}}$  sites whereas the monoprotonated  $\text{bdeaH}^-$  groups in 5 bind to the  $\{\text{Zr}_6\text{O}_8\}$  core only via one alkoxy O site. Color codes as in Fig. 2.

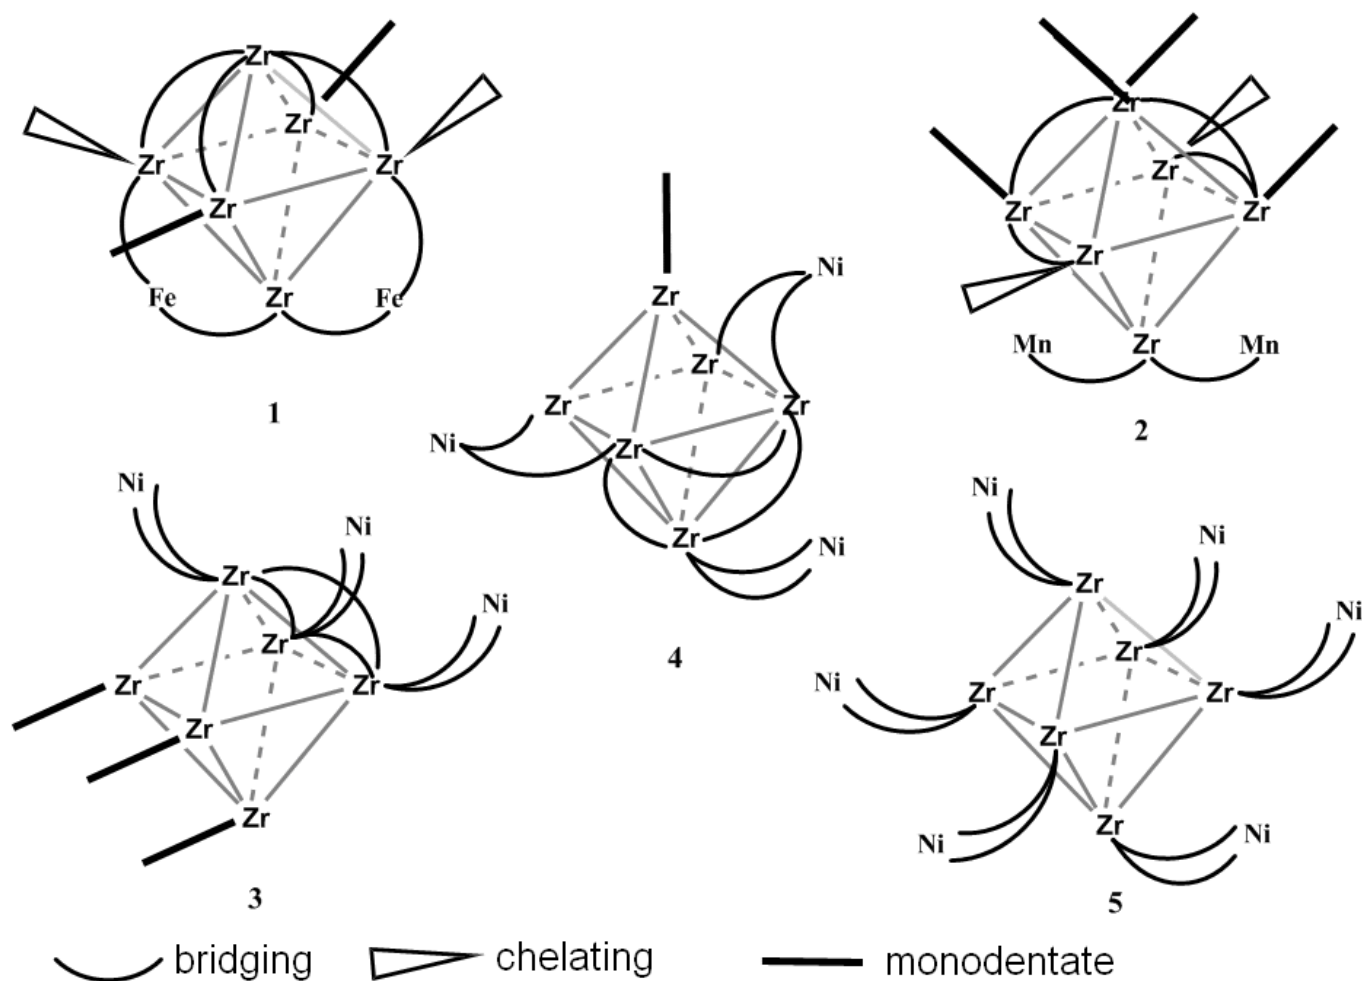

**Figure S2.** Schematic representation of coordination modes of carboxylate ligands in 1–5 (pivalates in 1 and isobutyrate in 2–5). In 1 eight pivalates form bridges between both Zr atoms and Zr and Fe atoms, coordinating to the metal sites in the usual  $\mu_2$ -1,3 coordination fashion: four of them stabilize the  $\{Zr_6O_4(OH)_4\}^{12+}$  core bridging Zr···Zr edges and the other four pivalates connect two Fe sites to the oxozirconium cluster. Three other pivalate ligands function as chelate ligands whereas the remaining two pivalate ligands are coordinated to Zr atoms in a monodentate fashion. In 2 only six isobutyrate ligands form bidentate bridges: four carboxylates link Zr···Zr edges in the octahedron as in 1, and two Mn atoms are bridged to the oxozirconium cluster by only two isobutyrate groups; two other carboxylate moieties are chelating and finally four isobutyrate are monodentate ligands coordinated to Zr atoms. In 3 the isobutyrate ligands display two types of coordination modes, bridging and monodentate: nine carboxylate moieties act as bridging ligands, three of them bridge Zr atoms in the octahedron, three other carboxylates link the three nickel atoms to the zirconium atoms of the  $Zr_6$  polyhedron, each of the remaining three isobutyrate ligands is coordinating to the zirconium atoms in a monodentate mode. Out of the ten isobutyrate in compound 4 only one carboxylate is bound in a monodentate fashion to a Zr atom, whereas six other isobutyrate ligands are bridging the Ni atoms to the  $Zr_6$  octahedron and the remaining three isobutyrate bridged the edges of the  $Zr_6$  octahedron. In complex 5 all twelve carboxylate ligands behave as bridging one and each of six Ni atoms connected to the oxozirconium  $Zr_6O_8$  core by two carboxylate bridging groups.

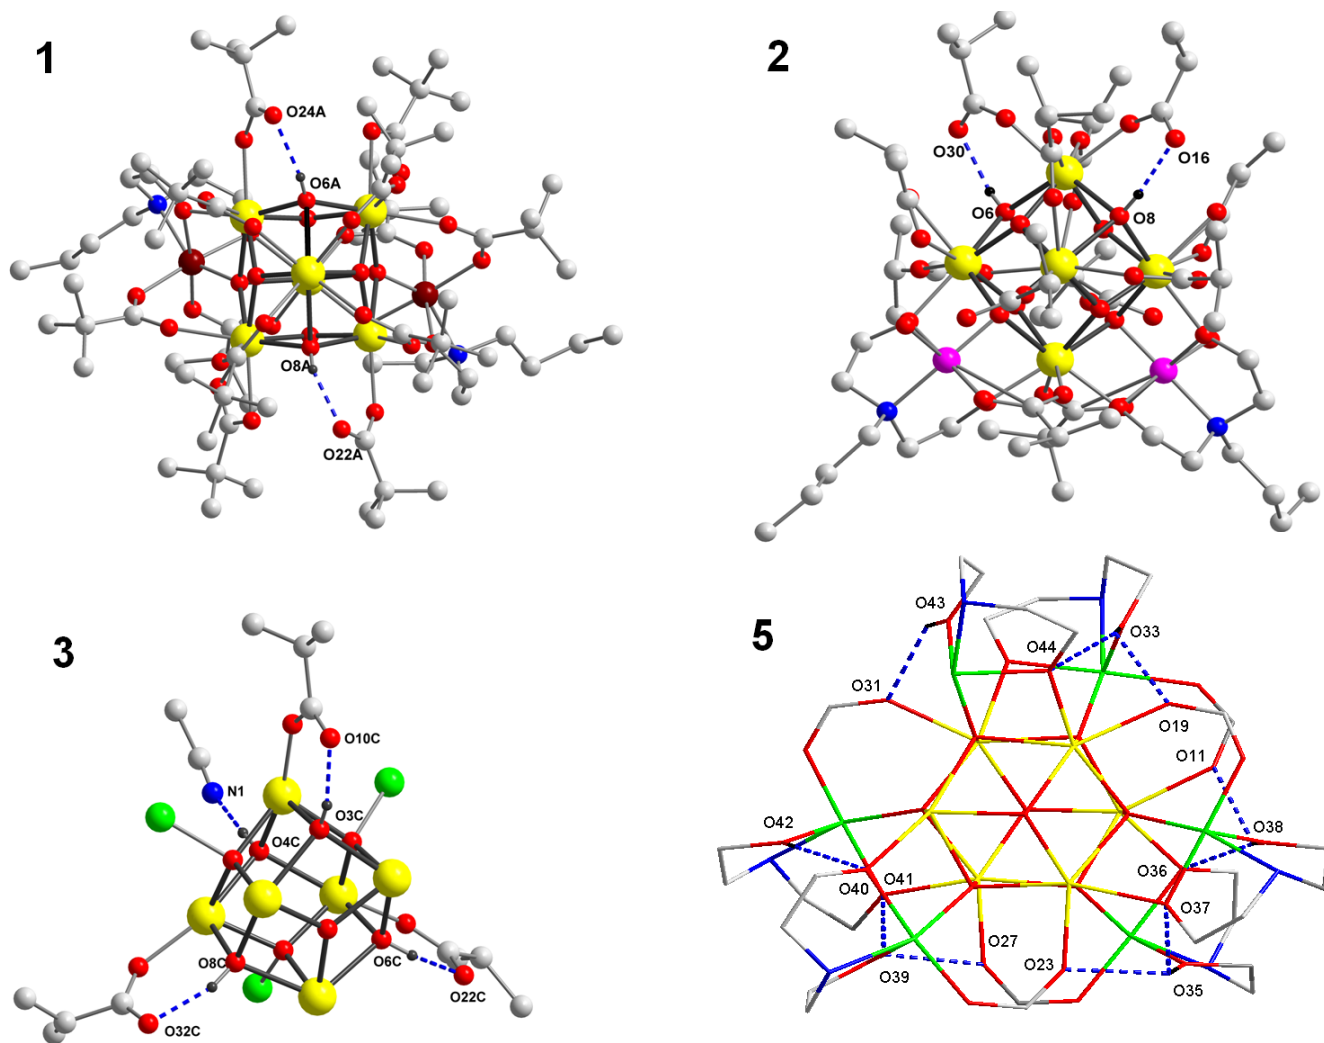

**Figure S3.** Intramolecular hydrogen bonds (dashed blue lines) in 1, 2, 3, and 5.

**Table S1.** Bond valence sum calculations for Fe, Mn and Ni sites in compounds 1–5

|                   |       | Assignment       |
|-------------------|-------|------------------|
| <b>Compound 1</b> |       |                  |
| Fe1A              | 3.167 | Fe <sup>3+</sup> |
| Fe2A              | 3.217 | Fe <sup>3+</sup> |
| Fe1B              | 3.186 | Fe <sup>3+</sup> |
| Fe2B              | 3.170 | Fe <sup>3+</sup> |
| <b>Compound 2</b> |       |                  |
| Mn1               | 3.126 | Mn <sup>3+</sup> |
| Mn2               | 3.166 | Mn <sup>3+</sup> |
| <b>Compound 3</b> |       |                  |
| Ni1A              | 2.163 | Ni <sup>2+</sup> |
| Ni2A              | 2.111 | Ni <sup>2+</sup> |
| Ni3A              | 2.164 | Ni <sup>2+</sup> |
| Ni1B              | 2.119 | Ni <sup>2+</sup> |
| Ni2B              | 2.148 | Ni <sup>2+</sup> |
| Ni3B              | 2.194 | Ni <sup>2+</sup> |
| Ni1C              | 2.128 | Ni <sup>2+</sup> |
| Ni2C              | 2.156 | Ni <sup>2+</sup> |
| Ni3C              | 2.101 | Ni <sup>2+</sup> |
| <b>Compound 4</b> |       |                  |
| Ni1               | 2.096 | Ni <sup>2+</sup> |
| Ni2               | 2.076 | Ni <sup>2+</sup> |
| Ni3               | 2.120 | Ni <sup>2+</sup> |
| <b>Compound 5</b> |       |                  |
| Ni1               | 2.073 | Ni <sup>2+</sup> |
| Ni2               | 2.065 | Ni <sup>2+</sup> |
| Ni3               | 2.109 | Ni <sup>2+</sup> |
| Ni4               | 2.044 | Ni <sup>2+</sup> |
| Ni5               | 2.085 | Ni <sup>2+</sup> |
| Ni6               | 2.058 | Ni <sup>2+</sup> |



**Table S2.** Selected bond distances (Å) between Zr ions and  $\mu_3$ -O(H) in  $\{\text{Zr}_6\text{O}_8\}$  in **1-4**

|                                       |          |              |          |              |          |
|---------------------------------------|----------|--------------|----------|--------------|----------|
| <b>1</b> $\{\text{Fe}_2\text{Zr}_6\}$ |          |              |          |              |          |
| Zr(2A)-O(6A)                          | 2.364(4) | Zr(2A)-O(8A) | 2.347(4) |              |          |
| Zr(5A)-O(6A)                          | 2.175(4) | Zr(3A)-O(8A) | 2.159(4) |              |          |
| Zr(6A)-O(6A)                          | 2.221(4) | Zr(4A)-O(8A) | 2.218(4) |              |          |
| Zr(2B)-O(6B)                          | 2.369(4) | Zr(2B)-O(8B) | 2.375(4) |              |          |
| Zr(5B)-O(6B)                          | 2.186(4) | Zr(3B)-O(8B) | 2.171(4) |              |          |
| Zr(6B)-O(6B)                          | 2.221(4) | Zr(4B)-O(8B) | 2.225(4) |              |          |
| <b>2</b> $\{\text{Mn}_2\text{Zr}_6\}$ |          |              |          |              |          |
| Zr(2)-O(6)                            | 2.306(6) | Zr(2)-O(8)   | 2.305(6) |              |          |
| Zr(5)-O(6)                            | 2.235(7) | Zr(3)-O(8)   | 2.222(6) |              |          |
| Zr(6)-O(6)                            | 2.269(6) | Zr(4)-O(8)   | 2.274(7) |              |          |
| <b>3</b> $\{\text{Ni}_3\text{Zr}_6\}$ |          |              |          |              |          |
| Zr(1A)-O(3A)                          | 2.166(4) | Zr(1B)-O(3B) | 2.164(4) | Zr(1C)-O(3C) | 2.181(4) |
| Zr(5A)-O(3A)                          | 2.329(4) | Zr(5B)-O(3B) | 2.320(4) | Zr(5C)-O(3C) | 2.302(4) |
| Zr(6A)-O(3A)                          | 2.321(3) | Zr(6B)-O(3B) | 2.318(4) | Zr(6C)-O(3C) | 2.314(4) |
| Zr(1A)-O(4A)                          | 2.312(4) | Zr(1B)-O(4B) | 2.312(4) | Zr(1C)-O(4C) | 2.314(4) |
| Zr(3A)-O(4A)                          | 2.328(4) | Zr(3B)-O(4B) | 2.318(4) | Zr(3C)-O(4C) | 2.292(4) |
| Zr(4A)-O(4A)                          | 2.332(4) | Zr(4B)-O(4B) | 2.329(4) | Zr(4C)-O(4C) | 2.300(4) |
| Zr(2A)-O(6A)                          | 2.340(4) | Zr(2B)-O(6B) | 2.336(4) | Zr(2C)-O(8C) | 2.312(4) |
| Zr(4A)-O(6A)                          | 2.154(4) | Zr(4B)-O(6B) | 2.156(4) | Zr(4C)-O(6C) | 2.167(4) |
| Zr(5A)-O(6A)                          | 2.333(4) | Zr(5B)-O(6B) | 2.329(4) | Zr(5C)-O(6C) | 2.323(4) |
| Zr(2A)-O(8A)                          | 2.316(4) | Zr(2B)-O(8B) | 2.323(4) | Zr(2C)-O(6C) | 2.311(4) |
| Zr(3A)-O(8A)                          | 2.171(4) | Zr(3B)-O(8B) | 2.170(4) | Zr(3C)-O(8C) | 2.179(4) |
| Zr(6A)-O(8A)                          | 2.305(4) | Zr(6B)-O(8B) | 2.302(4) | Zr(6C)-O(8C) | 2.301(4) |
| <b>4</b> $\{\text{Ni}_3\text{Zr}_6\}$ |          |              |          |              |          |
| Zr(1)-O(2)                            | 2.189(2) | Zr(4)-O(7)   | 2.207(2) |              |          |
| Zr(4)-O(2)                            | 2.298(2) | Zr(5)-O(8)   | 2.219(2) |              |          |
| Zr(5)-O(2)                            | 2.298(2) | Zr(6)-O(8)   | 2.331(2) |              |          |
| Zr(3)-O(4)                            | 2.344(2) | Zr(2)-O(8)   | 2.285(2) |              |          |
| Zr(6)-O(4)                            | 2.349(2) |              |          |              |          |
| Zr(1)-O(4)                            | 2.218(2) |              |          |              |          |
| Zr(3)-O(7)                            | 2.317(2) |              |          |              |          |
| Zr(2)-O(7)                            | 2.312(2) |              |          |              |          |



**Table S3.** Crystal data and details of crystallographic refinements

|                                                                  | 1                                                                        | 2                                                                        | 3                                                                        | 4                                                                        | 5                                                                        |
|------------------------------------------------------------------|--------------------------------------------------------------------------|--------------------------------------------------------------------------|--------------------------------------------------------------------------|--------------------------------------------------------------------------|--------------------------------------------------------------------------|
| Empirical formula                                                | $C_{78}H_{147.5}Fe_2N_3O_{36.25}Zr_6$                                    | $C_{64}H_{124}Mn_2N_2O_{38}Zr_6$                                         | $C_{220}H_{425}N_{11}Ni_9O_{114}Zr_{18}$                                 | $C_{80}H_{141}N_5Ni_3O_{36}Zr_6$                                         | $C_{120}H_{216.5}N_8Ni_6O_{54}Zr_6$                                      |
| Formula weight ( $g\ mol^{-1}$ )                                 | 2366.51                                                                  | 2186.85                                                                  | 7219.06                                                                  | 2472.43                                                                  | 3534.59                                                                  |
| Temperature (K)                                                  | 130(2)                                                                   | 173(2)                                                                   | 153(2)                                                                   | 130(2)                                                                   | 143(2)                                                                   |
| Wavelength (Å)                                                   | 0.71073                                                                  | 0.71073                                                                  | 0.71073                                                                  | 0.71073                                                                  | 0.71073                                                                  |
| Crystal system                                                   | Monoclinic                                                               | Triclinic                                                                | Orthorhombic                                                             | Triclinic                                                                | Triclinic                                                                |
| Space group                                                      | $Pn$                                                                     | $P-1$                                                                    | $P2(1)2(1)2(1)$                                                          | $P-1$                                                                    | $P-1$                                                                    |
| $a$ (Å)                                                          | 16.2199(8)                                                               | 14.350(1)                                                                | 20.363(7)                                                                | 14.945(3)                                                                | 15.269(7)                                                                |
| $b$ (Å)                                                          | 24.6037(1)                                                               | 16.034(2)                                                                | 31.919(1)                                                                | 15.548(3)                                                                | 17.907(8)                                                                |
| $c$ (Å)                                                          | 26.3241(1)                                                               | 23.32(2)                                                                 | 47.502(2)                                                                | 25.356(5)                                                                | 28.743(1)                                                                |
| $\alpha$ (°)                                                     | 90                                                                       | 102.439(2)                                                               | 90                                                                       | 77.22(3)                                                                 | 83.343(1)                                                                |
| $\beta$ (°)                                                      | 90.2200(1)                                                               | 95.803(2)                                                                | 90                                                                       | 75.05(3)                                                                 | 75.143(1)                                                                |
| $\gamma$ (°)                                                     | 90                                                                       | 115.106(2)                                                               | 90                                                                       | 64.91(3)                                                                 | 76.450(1)                                                                |
| $V$ (Å <sup>3</sup> )                                            | 10505.1(9)                                                               | 4631(9)                                                                  | 30874.2(2)                                                               | 5113.0(17)                                                               | 7371.9(6)                                                                |
| $Z$                                                              | 4                                                                        | 2                                                                        | 4                                                                        | 2                                                                        | 2                                                                        |
| $D_c$ ( $g\ cm^{-3}$ )                                           | 1.496                                                                    | 1.568                                                                    | 1.553                                                                    | 1.606                                                                    | 1.592                                                                    |
| $\mu$ ( $mm^{-1}$ )                                              | 0.915                                                                    | 0.991                                                                    | 1.196                                                                    | 1.205                                                                    | 1.239                                                                    |
| $F(000)$                                                         | 4872                                                                     | 2232                                                                     | 14816                                                                    | 2535                                                                     | 3664                                                                     |
| $\theta$ range for data collection (°)                           | 2.16 to 22.30                                                            | 1.67 to 21.97                                                            | 0.77 to 26.43                                                            | 0.84 to 30.83                                                            | 1.42 to 25.00                                                            |
| Index ranges                                                     | $-19 \leq h \leq 19$ ,<br>$-29 \leq k \leq 29$ ,<br>$-31 \leq l \leq 31$ | $-15 \leq h \leq 15$ ,<br>$-16 \leq k \leq 16$ ,<br>$-24 \leq l \leq 24$ | $-25 \leq h \leq 25$ ,<br>$-39 \leq k \leq 39$ ,<br>$-59 \leq l \leq 59$ | $-21 \leq h \leq 21$ ,<br>$-21 \leq k \leq 21$ ,<br>$-35 \leq l \leq 35$ | $-18 \leq h \leq 18$ ,<br>$-21 \leq k \leq 21$ ,<br>$-34 \leq l \leq 34$ |
| Reflections collected                                            | 111847                                                                   | 26640                                                                    | 277215                                                                   | 77385                                                                    | 58657                                                                    |
| Reflections unique                                               | 36869                                                                    | 11275                                                                    | 63297                                                                    | 29359                                                                    | 25822                                                                    |
| Completeness to $\theta_{max}$<br>Data / restraints / parameters | [R(int) = 0.0667]<br>99.9%                                               | [R(int) = 0.0822]<br>99.7%                                               | [R(int) = 0.0753]<br>99.8%                                               | [R(int) = 0.0459]<br>91.3%                                               | [R(int) = 0.0313]<br>99.4%                                               |
| Final R indices [ $I > 2\sigma(I)$ ]                             | 36869 / 126 / 2285<br>R1 = 0.0387,<br>wR2 = 0.0683                       | 11275 / 90 / 1010<br>R1 = 0.0574,<br>wR2 = 0.1270                        | 63297 / 93 / 3365<br>R1 = 0.0596,<br>wR2 = 0.1357                        | 29359 / 273 / 11193<br>R1 = 0.0467,<br>wR2 = 0.1296                      | 25822 / 0 / 1748<br>R1 = 0.0363,<br>wR2 = 0.0903                         |
| R indices (all data)                                             | R1 = 0.0547,<br>wR2 = 0.0710                                             | R1 = 0.1149,<br>wR2 = 0.1519                                             | R1 = 0.0911,<br>wR2 = 0.1528                                             | R1 = 0.0651,<br>wR2 = 0.1429                                             | R1 = 0.0529,<br>wR2 = 0.1049                                             |

---

|                          |       |       |       |       |       |
|--------------------------|-------|-------|-------|-------|-------|
| Goodness-of-fit on $F^2$ | 0.827 | 1.045 | 1.087 | 1.038 | 1.040 |
|--------------------------|-------|-------|-------|-------|-------|

---
